# Supplementary material
Source: PubMed Central journal article supplement (PMC9521041)
Supplement: ehp9934.s001.acco.pdf [file ehp9934.s001.acco.pdf]

**Note to readers with disabilities:** *EHP* strives to ensure that all journal content is accessible to all readers. However, some figures and Supplemental Material published in *EHP* articles may not conform to [508 standards](#) due to the complexity of the information being presented. If you need assistance accessing journal content, please contact [ehp508@niehs.nih.gov](mailto:ehp508@niehs.nih.gov). Our staff will work with you to assess and meet your accessibility needs within 3 working days.

### **Supplemental Material**

#### **Health Effects of Pesticide Exposure in Latin American and the Caribbean Populations: A Scoping Review**

Liliana A. Zúñiga-Venegas, Carly Hyland, María Teresa Muñoz-Quezada, Lesliam Quirós-Alcalá, Mariana Butinof, Rafael Buralli, Andres Cardenas, Ricardo A. Fernandez, Claudia Foerster, Nelson Gouveia, Juan P. Gutiérrez Jara, Boris A. Lucero, María Pía Muñoz, Muriel Ramírez-Santana, Anna R. Smith, Noemi Tirado, Berna van Wendel de Joode, Gloria M. Calaf, Alexis J. Handal, Agnes Soares da Silva, Sandra Cortés, and Ana M. Mora

#### **Table of Contents**

**Table S1.** Characteristics of Latin American and the Caribbean studies on pesticide exposure and health outcomes published between 2007 and 2021 by country (n=233).

**Figure S1.** Latin American and the Caribbean studies on pesticide exposure and health outcomes published between 2007 and 2021 by year of publication.

**Additional File-** Excel Document



|                                            |    |   |    |   |   |   |   |   |   |   |   |    |   |   |   |   |
|--------------------------------------------|----|---|----|---|---|---|---|---|---|---|---|----|---|---|---|---|
| Natural pesticides                         | 0  | 0 | 1  | 0 | 0 | 0 | 0 | 0 | 0 | 0 | 0 | 0  | 0 | 0 | 0 | 0 |
| Multiple pesticide classes                 | 8  | 2 | 59 | 0 | 3 | 2 | 1 | 6 | 1 | 1 | 1 | 11 | 3 | 1 | 1 | 2 |
| Main health outcomes <sup>g</sup>          |    |   |    |   |   |   |   |   |   |   |   |    |   |   |   |   |
| Genotoxicity                               | 11 | 3 | 25 | 0 | 3 | 0 | 1 | 3 | 0 | 0 | 0 | 15 | 0 | 1 | 0 | 0 |
| Neurobehavioral outcomes                   | 1  | 1 | 13 | 6 | 1 | 8 | 0 | 9 | 0 | 5 | 1 | 9  | 0 | 0 | 0 | 0 |
| Placenta outcomes and teratogenicity       | 5  | 0 | 4  | 0 | 0 | 0 | 0 | 0 | 0 | 1 | 0 | 3  | 0 | 0 | 0 | 0 |
| Cancer                                     | 0  | 0 | 9  | 0 | 0 | 2 | 0 | 0 | 0 | 2 | 0 | 1  | 0 | 0 | 0 | 0 |
| Thyroid function                           | 0  | 1 | 4  | 0 | 1 | 0 | 0 | 1 | 0 | 2 | 0 | 5  | 0 | 0 | 0 | 1 |
| Reproductive outcomes                      | 2  | 0 | 4  | 0 | 1 | 0 | 0 | 0 | 0 | 1 | 0 | 4  | 0 | 0 | 1 | 3 |
| Birth outcomes and child growth            | 5  | 1 | 1  | 0 | 0 | 1 | 0 | 0 | 0 | 3 | 0 | 2  | 0 | 0 | 0 | 0 |
| Other effects <sup>h</sup>                 |    |   |    |   |   |   |   |   |   |   |   |    |   |   |   |   |
| Kidney function                            | 0  | 0 | 2  | 0 | 0 | 0 | 0 | 0 | 1 | 0 | 0 | 1  | 4 | 0 | 1 | 0 |
| Respiratory and allergic outcomes          | 0  | 0 | 2  | 0 | 1 | 3 | 0 | 0 | 0 | 0 | 0 | 1  | 0 | 0 | 0 | 0 |
| Liver injury                               | 1  | 0 | 5  | 0 | 0 | 0 | 0 | 1 | 0 | 0 | 0 | 1  | 0 | 0 | 0 | 0 |
| Hematological parameters and lipid profile | 1  | 0 | 10 | 0 | 2 | 0 | 0 | 1 | 0 | 0 | 0 | 3  | 0 | 0 | 0 | 0 |
| Acoustic damage                            | 0  | 0 | 8  | 0 | 0 | 0 | 0 | 0 | 0 | 0 | 0 | 0  | 0 | 0 | 0 | 0 |
| Others                                     | 3  | 1 | 12 | 1 | 0 | 0 | 0 | 4 | 0 | 3 | 0 | 2  | 0 | 0 | 0 | 0 |

<sup>g</sup>n across all countries >233 because one published study (Maluf et al., 2009) was conducted in three countries (Argentina, Brazil, and Mexico).

<sup>h</sup>We only included studies published up until December 2021 in our review.

<sup>i</sup>A total of 125 published studies employed direct exposure assessment methods, with some measuring both cholinesterase activity and pesticides/pesticide metabolites. Of these, 81 (65.9%) used data from the direct exposure assessment in exposure-outcome analyses (e.g., some studies measured urinary biomarkers of exposure and ascertained occupational status via questionnaire, but only reported exposure-outcome associations using occupational status).

<sup>j</sup>n across all countries >233 because some published studies employed more than one exposure assessment method (e.g., measurement of cholinesterase activity in blood and urinary pesticide metabolites).

<sup>k</sup>Only for published studies with direct pesticide exposure assessment, but nine studies measured pesticides in more than one biological matrix.

<sup>l</sup>n across all countries >233 because some published studies assessed multiple pesticide groups.

<sup>m</sup>n across all countries >233 because some published studies assessed outcomes from more than one group.

<sup>n</sup>Total studies that assessed other health effects >70 because some assessed multiple outcomes in this category (e.g., several published studies examined liver injury and hematological parameters).

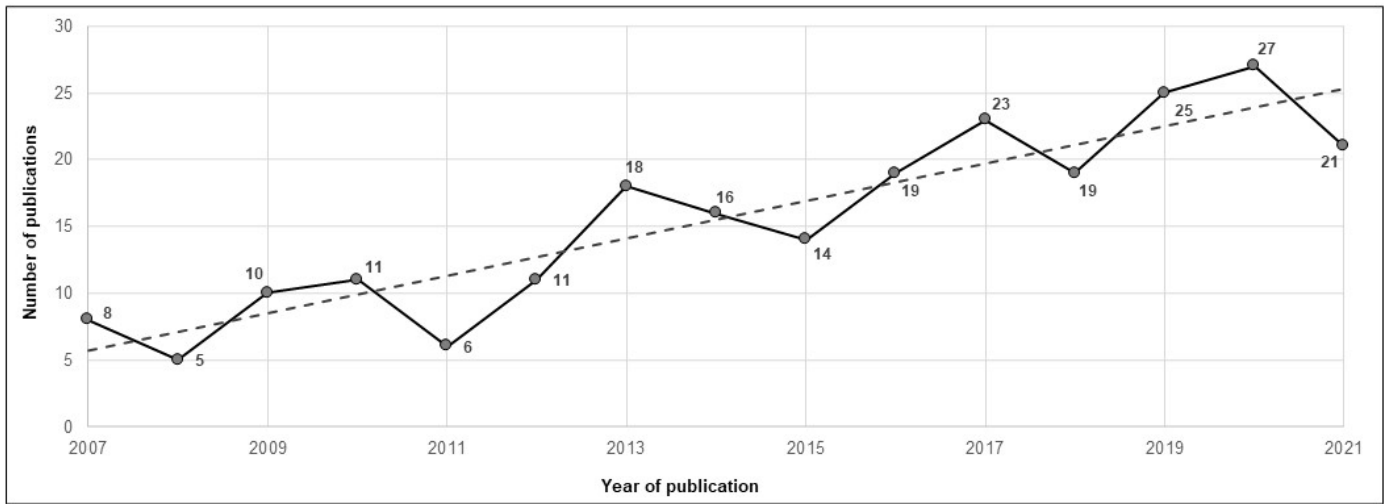

**Figure S1.** Latin American and the Caribbean studies on pesticide exposure and health outcomes published between 2007 and 2021 by year of publication.
