# Supplementary material
Source: PubMed Central journal article supplement (PMC9521041)
Supplement: ehp9934.smcontents.508.pdf [file ehp9934.smcontents.508.pdf]

**Note to readers with disabilities:** *EHP* strives to ensure that all journal content is accessible to all readers. However, some figures and Supplemental Material published in *EHP* articles may not conform to [508 standards](#) due to the complexity of the information being presented. If you need assistance accessing journal content, please contact [ehp508@niehs.nih.gov](mailto:ehp508@niehs.nih.gov). Our staff will work with you to assess and meet your accessibility needs within 3 working days.

### **Supplemental Material**

#### **Health Effects of Pesticide Exposure in Latin American and the Caribbean Populations: A Scoping Review**

Liliana A. Zúñiga-Venegas, Carly Hyland, María Teresa Muñoz-Quezada, Lesliam Quirós-Alcalá, Mariana Butinof, Rafael Buralli, Andres Cardenas, Ricardo A. Fernandez, Claudia Foerster, Nelson Gouveia, Juan P. Gutiérrez Jara, Boris A. Lucero, María Pía Muñoz, Muriel Ramírez-Santana, Anna R. Smith, Noemi Tirado, Berna van Wendel de Joode, Gloria M. Calaf, Alexis J. Handal, Agnes Soares da Silva, Sandra Cortés, and Ana M. Mora

#### **Table of Contents**

**Table S1.** Characteristics of Latin American and the Caribbean studies on pesticide exposure and health outcomes published between 2007 and 2021 by country (n=233).

**Figure S1.** Latin American and the Caribbean studies on pesticide exposure and health outcomes published between 2007 and 2021 by year of publication.

**Additional File-** Excel Document
